# Supplementary material for: Atmospheric pressure chemical vapour deposition of boron doped titanium dioxide for photocatalytic water reduction and oxidation
Source: Royal Society of Chemistry journal article supplement (doi:10.1039/c3cp52665h), 2013-01-01
Supplement: c3cp52665h.pdf [file c3cp52665h.pdf]

## Supplementary Information

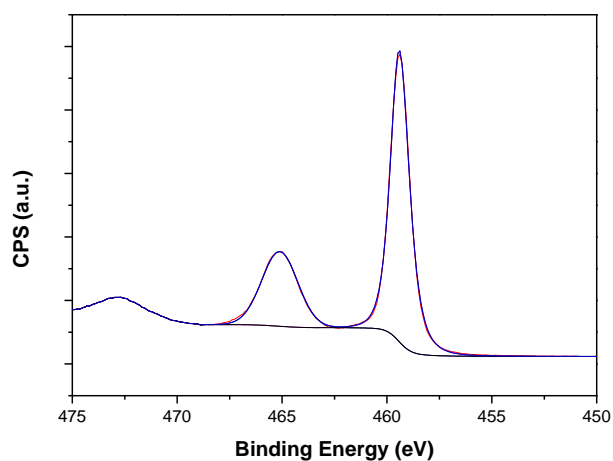

5

Supplementary 1. Ti 2p XPS scan

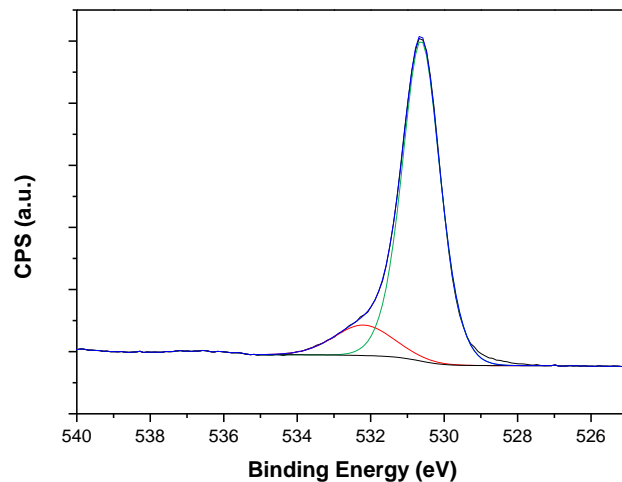

Supplementary 2. O 1s XPS scan, where the peak at lower binding energy is from TiO<sub>2</sub> and the small peak at ~532 eV can be attributed to organic contamination on the surface of the substrate

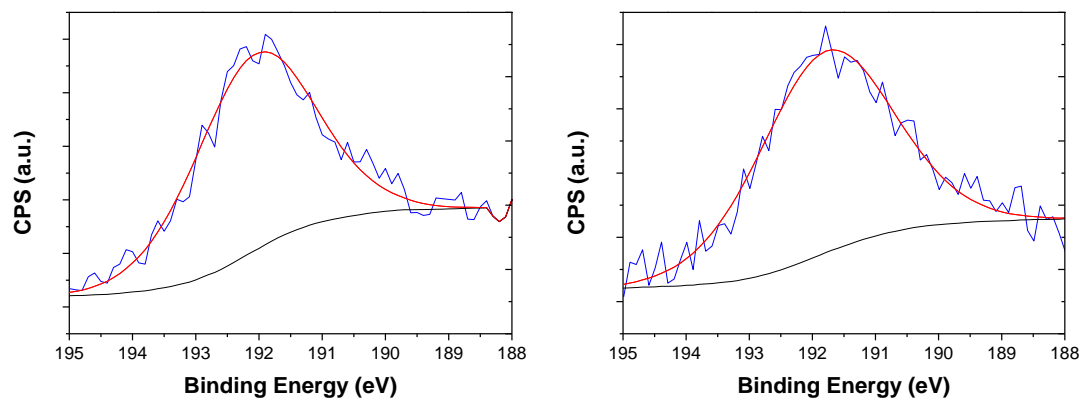

10

Supplementary 3. B 1s XPS scans for boron doped TiO<sub>2</sub> deposited at 500 °C (left) and 600 °C (right)

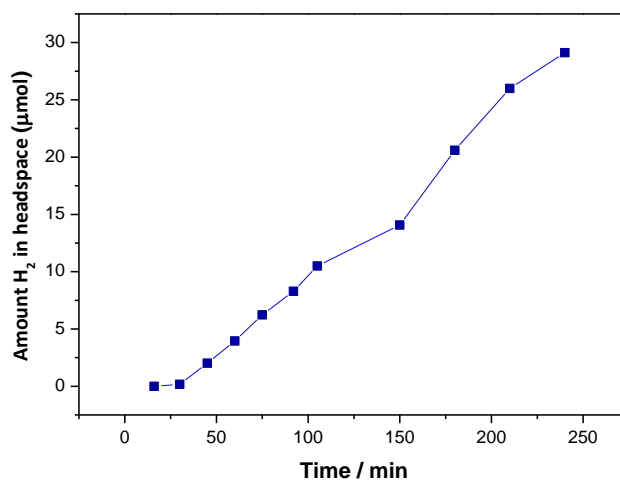

Supplementary 4. Sacrificial hydrogen evolution of best performing sample over a period of 4 hours

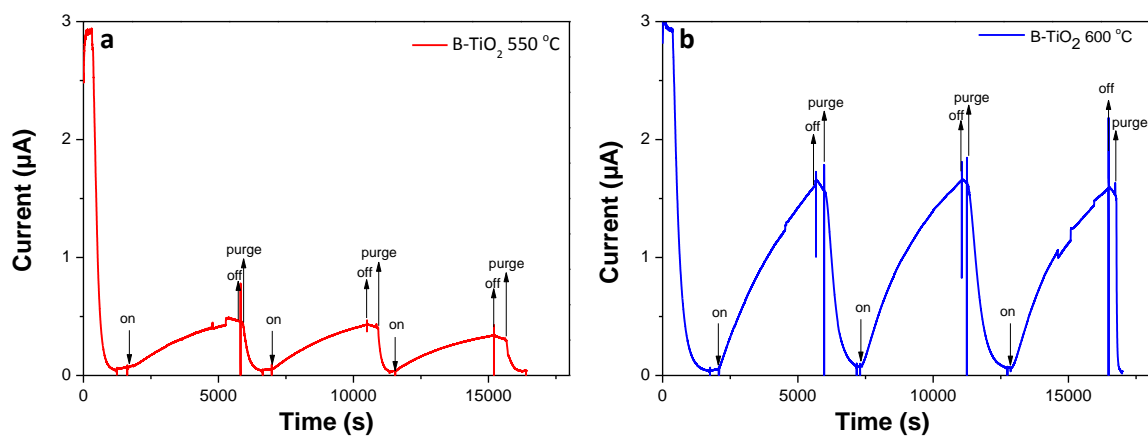

Supplementary 5. Sacrificial oxygen evolution of best performing B-TiO<sub>2</sub> deposited at a) 550 °C and b) 600 °C over three cycles with arrows indicating the light being turned on, off as well as the argon purge

5

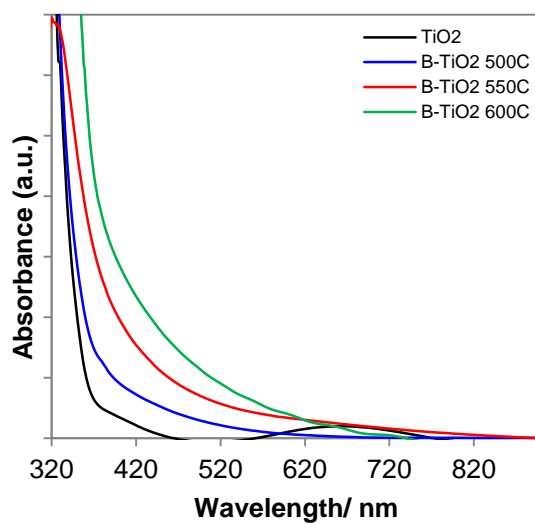

Supplementary 6. UV-vis of B-TiO<sub>2</sub> samples deposited on glass
